# Supplementary material for: Internalization studies on zeolite nanoparticles using human cells
Source: Royal Society of Chemistry journal article supplement (doi:10.1039/c7tb02534c), 2018-01-01
Supplement: c7tb02534c1.pdf [file c7tb02534c1.pdf]

## Supplementary Information

### Internalization Studies of Zeolite Nanoparticles by Human Cell

Natália Vilaça,<sup>a</sup> Ricardo Totovao,<sup>b</sup> Eko Adi Prasetyanto,<sup>bc</sup> Vera Miranda-Gonçalves,<sup>d</sup> Filipa Morais-Santos,<sup>ef</sup> Rui Fernandes,<sup>g</sup> Francisco Figueiredo,<sup>g</sup> Manuel Bañobre-López,<sup>h</sup> António M. Fonseca,<sup>ai</sup> Luisa De Cola,<sup>b</sup> Fátima Baltazar<sup>\*ef</sup> and Isabel C. Neves<sup>\*ai</sup>

<sup>a</sup>Centre of Chemistry, Chemistry Department, University of Minho, Campus de Gualtar, 4710-057 Braga, Portugal;

<sup>b</sup>Institut de Science et Ingénierie Supramoléculaires (ISIS - UMR 7006), Université de Strasbourg & CNRS. 8 Rue Gaspard Monge, 67000 Strasbourg, France;

<sup>c</sup>Faculty of Medicine, Atma Jaya Catholic University of Indonesia, Jakarta, Indonesia;

<sup>d</sup>Cancer Biology & Epigenetics Group – Research Center (CI-IPOP), Portuguese Oncology Institute of Porto (IPO Porto), Porto, Portugal;

<sup>e</sup>Life and Health Sciences Research Institute (ICVS), School of Medicine, University of Minho, Campus de Gualtar, Braga, Portugal;

<sup>f</sup>ICVS/3B's - PT Government Associate Laboratory, Braga/Guimarães, Portugal;

<sup>g</sup>i3S - Instituto de Investigação e Inovação em Saúde and HEMS / IBMC - Histology and Electron Microscopy Service, Universidade do Porto, 4200-135 Porto, Portugal;

<sup>h</sup>International Iberian Nanotechnology Laboratory (INL), Av. Mestre José Veiga, 4715-330 Braga, Portugal;

<sup>i</sup>CEB - Centre of Biological Engineering, University of Minho, 4710-057 Braga, Portugal;

\*Corresponding author: [ineves@quimica.uminho.pt](mailto:ineves@quimica.uminho.pt); [fbaltazar@med.uminho.pt](mailto:fbaltazar@med.uminho.pt)

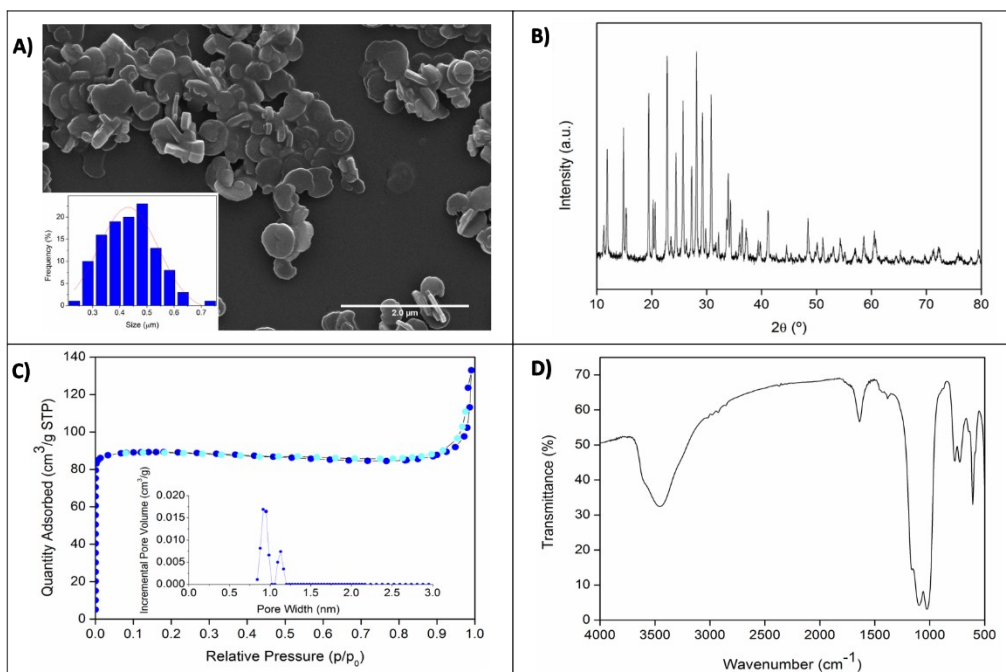

**Figure S1:** Characterization of the synthesized zeolite L. A) SEM micrographs of zeolite L dispersed in ethanol. Inset: Histogram representing statistical size distribution of zeolite L nanoparticles. B) XRD pattern of zeolite L. C) Nitrogen adsorption of zeolite L. Inset: pore size distribution. D) FTIR spectrum of zeolite L.

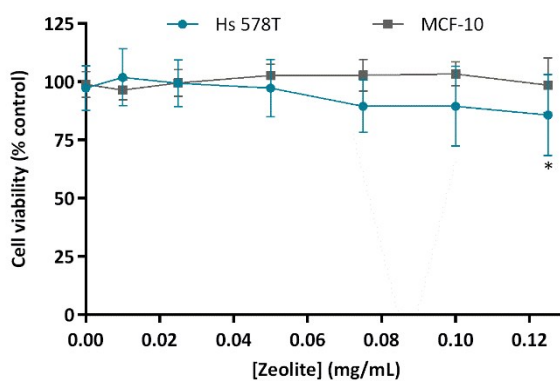

**Figure S2:** Cell viability of Hs 578T and MCF-10 cells, evaluated with SRB assay after 48 h incubation time with increasing concentrations of zeolite. Results are expressed in relation to the control (0 % of zeolite, considered 100 % of viability) as mean  $\pm$  SD of three independent experiments, each performed in triplicate. Differences with a  $p < 0.05$  were considered statistically significant (\*).

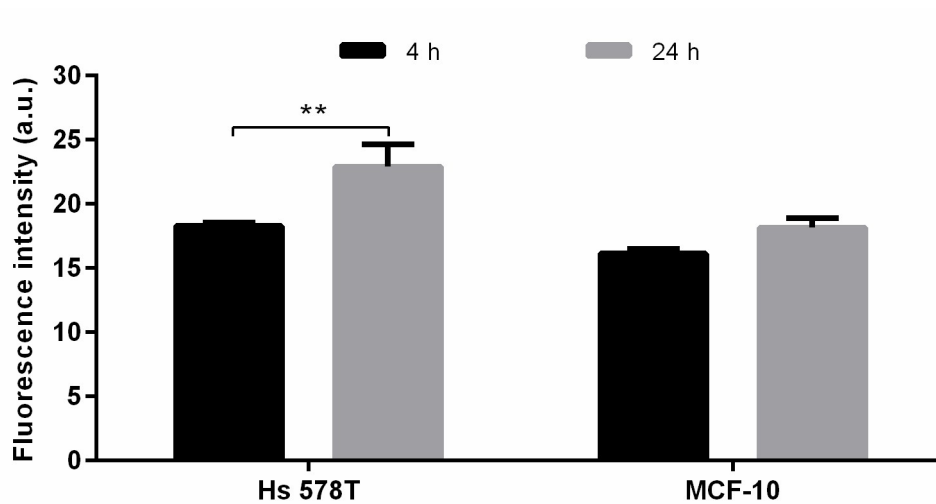

**Figure S3:** Fluorescence intensity measured using ImageJ Software. Zeolite L nanoparticles were incubated with Hs 578T and MCF-10 cells for 4 and 24 h incubation times at a concentration of 50  $\mu\text{g}/\text{mL}$ . Difference between groups were evaluated by Two-way ANOVA followed by Bonferroni post-test. Results are expressed as mean  $\pm$  SD,  $n=3$  for all experiments. \*\* $p<0.01$ .

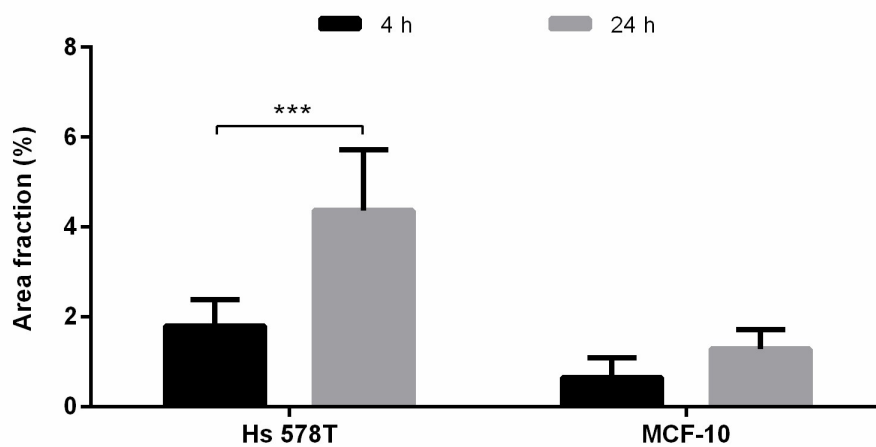

**Figure S4:** Percentage of zeolite L nanoparticles internalized by Hs 578T and MCF-10 cells. Cells were incubated with 50  $\mu\text{g}/\text{mL}$  of zeolite L at 4 and 24 h incubation times. Results were analyzed by ImageJ Software. Difference between groups were evaluated by Two-way ANOVA followed by Bonferroni post-test. \*\*\* $p<0.001$ . Mean  $\pm$  SD.  $n=4$  for Hs 578T experiments and  $n=5$  for MCF-10 experiments.

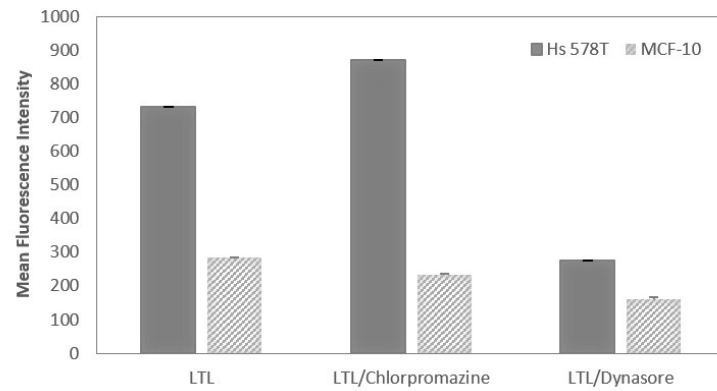

**Figure S5:** Effects of the pharmacological inhibitors on the uptake of zeolite L in Hs 578T and MCF-10 cells. Cells were treated with chlorpromazine (10  $\mu\text{g}/\text{mL}$ ) and dynasore (400  $\mu\text{M}$ ) for 1 h before incubation with 50  $\mu\text{g}/\text{mL}$  of zeolite L for 4 h. After incubation cells were collected and analyzed by flow cytometry.
